# Supplementary material for: A NMR-Based Metabonomics Approach to Determine Protective Effect of a Combination of Multiple Components Derived from Naodesheng on Ischemic Stroke Rats
Source: PubMed Central journal article supplement (PMC6539225; doi:10.3390/molecules24091831), 2019-05-13
Supplement: molecules-24-01831-s001.pdf [file molecules-24-01831-s001.pdf]

## Supplementary data

# A NMR-Based Metabonomics Approach to Determine Protective Effect of A Combination of Multiple Components Derived from Naodesheng on Ischemic Stroke Rats

Lan Luo<sup>1,2,3</sup>, Jiazhen Kang<sup>1,2,3</sup>, Qiong He<sup>1,2,3</sup>, Yue Qi<sup>1,2,3</sup>, Xingyu Chen<sup>1,2,3</sup>, Shumei Wang<sup>1,2,3</sup> and Shengwang Liang<sup>1,2,3,\*</sup>

<sup>1</sup> School of Traditional Chinese Medicine, Guangdong Pharmaceutical University, Guangzhou 510006, China; luolan1105@126.com (L.L.); KangJZl@163.com (J.K.); m15975633308@163.com (Q.H.); qiyue9339@163.com (Y.Q.); witwick@163.com (X.C.); shmwang@sina.com (S.W.)

<sup>2</sup> Key Laboratory of Digital Quality Evaluation of Chinese Materia Medica of State Administration of TCM, Guangdong Pharmaceutical University, Guangzhou 510006, China

<sup>3</sup> Engineering & Technology Research Center for Chinese Materia Medica Quality of the Universities of Guangdong Province, Guangdong Pharmaceutical University, Guangzhou 510006, China

\* Correspondence: swliang371@126.com; Tel.: +86-020-3935-2172 (S.L.)

**Table S1.** <sup>1</sup>H NMR data and assignments of the metabolites in rat plasma.

| Number | Metabolites                 | Chemical shift(ppm) | Observed  |
|--------|-----------------------------|---------------------|-----------|
| 1      | VLDL/LDL                    | 0.86m,1.27m         | COSY,HSQC |
| 2      | isoleucine                  | 0.94t               | COSY,HSQC |
| 3      | leucine                     | 0.96t               | COSY,HSQC |
| 4      | valine                      | 0.99d,1.04d         | COSY,HSQC |
| 5      | 3-hydroxybutyrate           | 4.15dt, 1.20d       | COSY,HSQC |
| 6      | lactate                     | 1.33d,4.11q         | COSY,HSQC |
| 7      | alanine                     | 1.48d, 3.78q        | COSY,HSQC |
| 8      | acetate                     | 1.92s               | HSQC      |
| 9      | N-acetyl glycoprotein       | 2.04s               | HSQC      |
| 10     | methionine                  | 2.14s,3.77m         | COSY,HSQC |
| 11     | acetone                     | 2.23s               | HSQC      |
| 12     | Acetoacetate                | 2.28s               | HSQC      |
| 13     | Pyruvate                    | 2.37s               | HSQC      |
| 14     | glutamine                   | 2.46m               | COSY,HSQC |
| 15     | creatine /phosphocreatine   | 3.04s,3.93s         | COSY,HSQC |
| 16     | TMAO/betaine                | 3.27s               | HSQC      |
| 17     | glycine                     | 3.56s               | HSQC      |
| 18     | a-glucose                   | 5.24d,3.53m         | COSY,HSQC |
| 19     | poly unsaturated fatty acid | 5.30m,2.77m         | COSY,HSQC |

**Table S2.** <sup>1</sup>H NMR data and assignments of the metabolites in rat urine.

| <b>Number</b> | <b>Metabolites</b>    | <b>Chemical shift(ppm)</b> | <b>Observed</b> |
|---------------|-----------------------|----------------------------|-----------------|
| 1             | 3-hydroxybutyrate     | 4.15dt, 1.20d              | COSY,HSQC       |
| 2             | N-acetyl glycoprotein | 2.04s                      | HSQC            |
| 3             | acetone               | 2.23s                      | HSQC            |
| 4             | acetoacetate          | 2.28s                      | HSQC            |
| 5             | succinate             | 2.41s                      | HSQC            |
| 6             | dimethylamine         | 2.72s                      | HSQC            |
| 7             | dimethylglycine       | 2.93s                      | HSQC            |
| 8             | creatinine            | 3.05s,4.06s                | COSY,HSQC       |
| 9             | phenylacetyl glycine  | 3.68s                      | HSQC            |

**Table S3.** <sup>1</sup>H NMR data and assignments of the metabolites in rat brain tissue.

| Number | Metabolites                                 | Chemical shift(ppm) | Observed  |
|--------|---------------------------------------------|---------------------|-----------|
| 1      | isoleucine                                  | 0.94t               | COSY,HSQC |
| 2      | leucine                                     | 0.96t               | COSY,HSQC |
| 3      | valine                                      | 0.99d,1.04d         | COSY,HSQC |
| 4      | lactate                                     | 1.33d,4.11q         | COSY,HSQC |
| 5      | alanine                                     | 1.48d, 3.78q        | COSY,HSQC |
| 6      | acetate                                     | 1.92s               | HSQC      |
| 7      | N-acetyl-aspartate                          | 2.02s,2.49dd,4.39dd | COSY,HSQC |
| 8      | N-acetylaspartylglutamate                   | 2.05s               | HSQC      |
| 9      | $\gamma$ -aminobutyric acid                 | 2.30t, 1.89m        | COSY,HSQC |
| 10     | glutamate                                   | 2.36m               | COSY,HSQC |
| 11     | succinate                                   | 2.41s               | HSQC      |
| 12     | glutamine                                   | 2.46m               | COSY,HSQC |
| 13     | aspartate                                   | 2.81dd,2.66dd       | COSY,HSQC |
| 14     | creatine/phosphocreatine                    | 3.04s,3.93s         | COSY,HSQC |
| 15     | choline                                     | 3.21s               | COSY,HSQC |
| 16     | phosphorylcholine/<br>glycerophosphocholine | 3.23s               | COSY,HSQC |
| 17     | <i>scyllo</i> -inositol                     | 3.35s               | HSQC      |
| 18     | taurine                                     | 3.43t               | COSY,HSQC |
| 19     | <i>myo</i> -inositol                        | 3.53dd,3.63t,4.07t  | COSY,HSQC |
| 20     | glycine                                     | 3.56s               | HSQC      |

**Table S4.** The PLS-DA model parameters between model group and other groups from plasma, urine and brain tissue.

| <b>PLS-DA model</b>             | <b>A</b> | <b>N</b> | <b>R<sup>2</sup>X</b> | <b>R<sup>2</sup>Y</b> | <b>Q<sup>2</sup></b> |
|---------------------------------|----------|----------|-----------------------|-----------------------|----------------------|
| Plasma                          |          |          |                       |                       |                      |
| model group vs control group    | 2        | 16       | 0.642                 | 0.997                 | 0.986                |
| model group vs nimodipine group | 2        | 16       | 0.534                 | 0.993                 | 0.972                |
| model group vs H-TCNDS group    | 2        | 16       | 0.396                 | 0.998                 | 0.950                |
| model group vs L-TCNDS group    | 2        | 16       | 0.357                 | 0.993                 | 0.897                |
| Urine                           |          |          |                       |                       |                      |
| model group vs control group    | 2        | 16       | 0.595                 | 0.998                 | 0.986                |
| model group vs nimodipine group | 2        | 16       | 0.553                 | 0.998                 | 0.986                |
| model group vs H-TCNDS group    | 2        | 16       | 0.416                 | 0.999                 | 0.979                |
| model group vs L-TCNDS group    | 2        | 16       | 0.389                 | 0.998                 | 0.976                |
| Brain tissue                    |          |          |                       |                       |                      |
| model group vs control group    | 2        | 16       | 0.537                 | 0.999                 | 0.983                |
| model group vs nimodipine group | 2        | 16       | 0.516                 | 0.997                 | 0.971                |
| model group vs H-TCNDS group    | 2        | 16       | 0.408                 | 0.997                 | 0.952                |
| model group vs L-TCNDS group    | 2        | 16       | 0.382                 | 0.996                 | 0.918                |

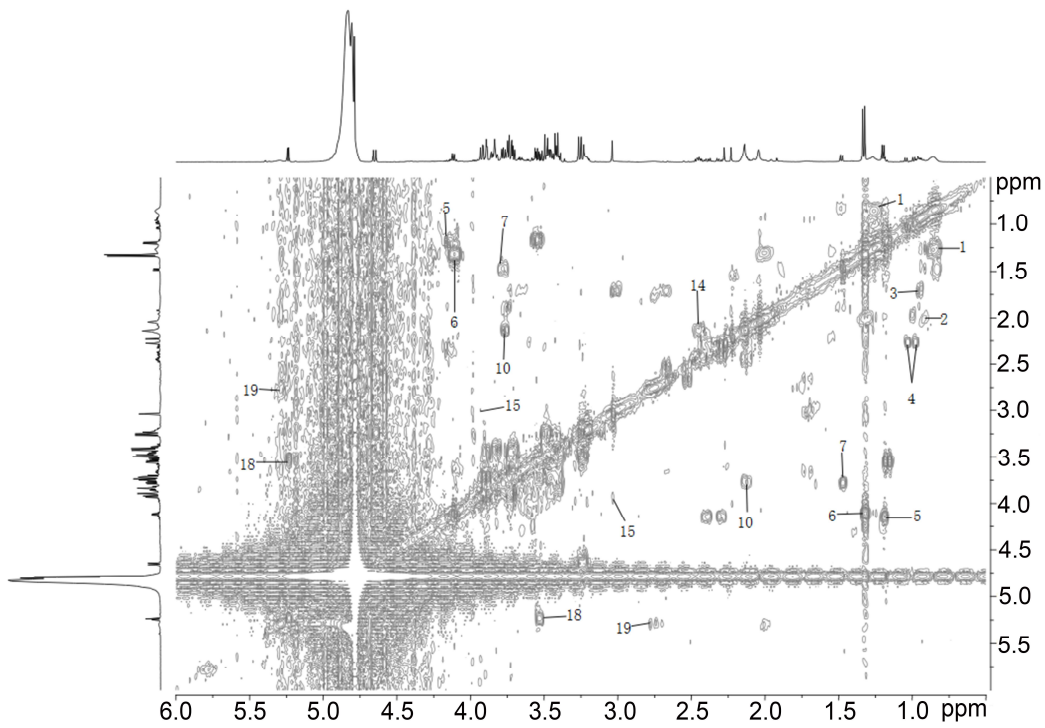

Figure S1.  $^1\text{H}$ - $^1\text{H}$  COSY spectrum of model rat plasma

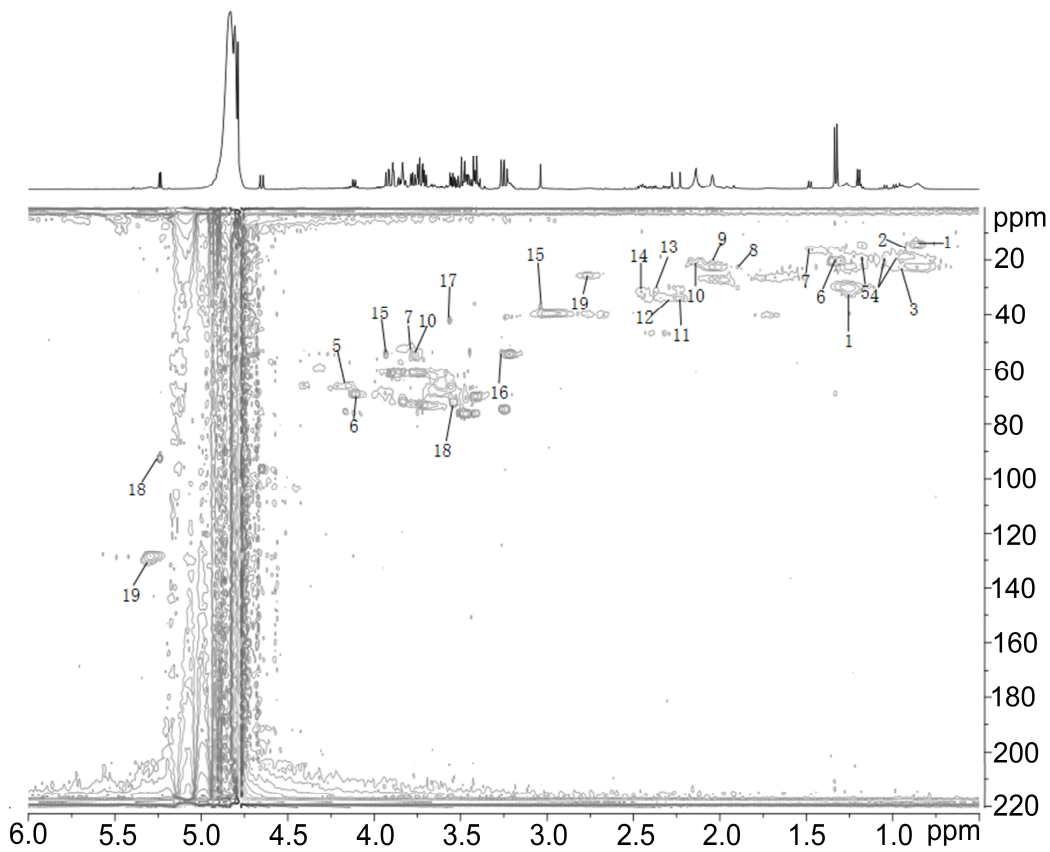

Figure S2.  $^1\text{H}$ - $^{13}\text{C}$  HSQC spectrum of model rat plasma

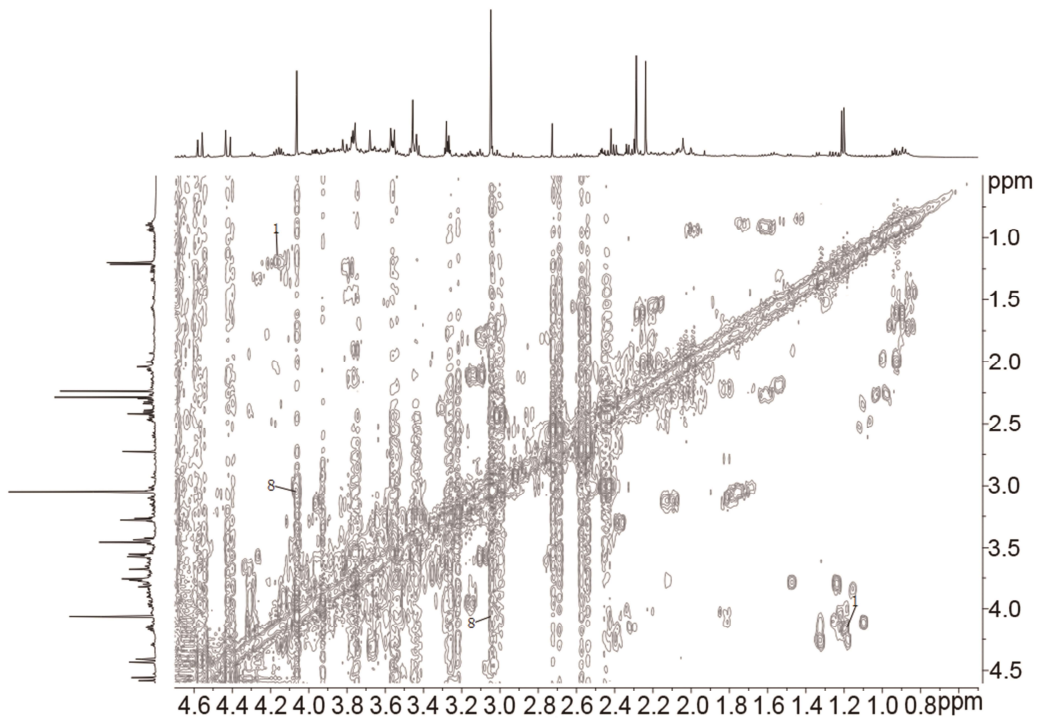

Figure S3.  $^1\text{H}$ - $^1\text{H}$  COSY spectrum of model rat urine

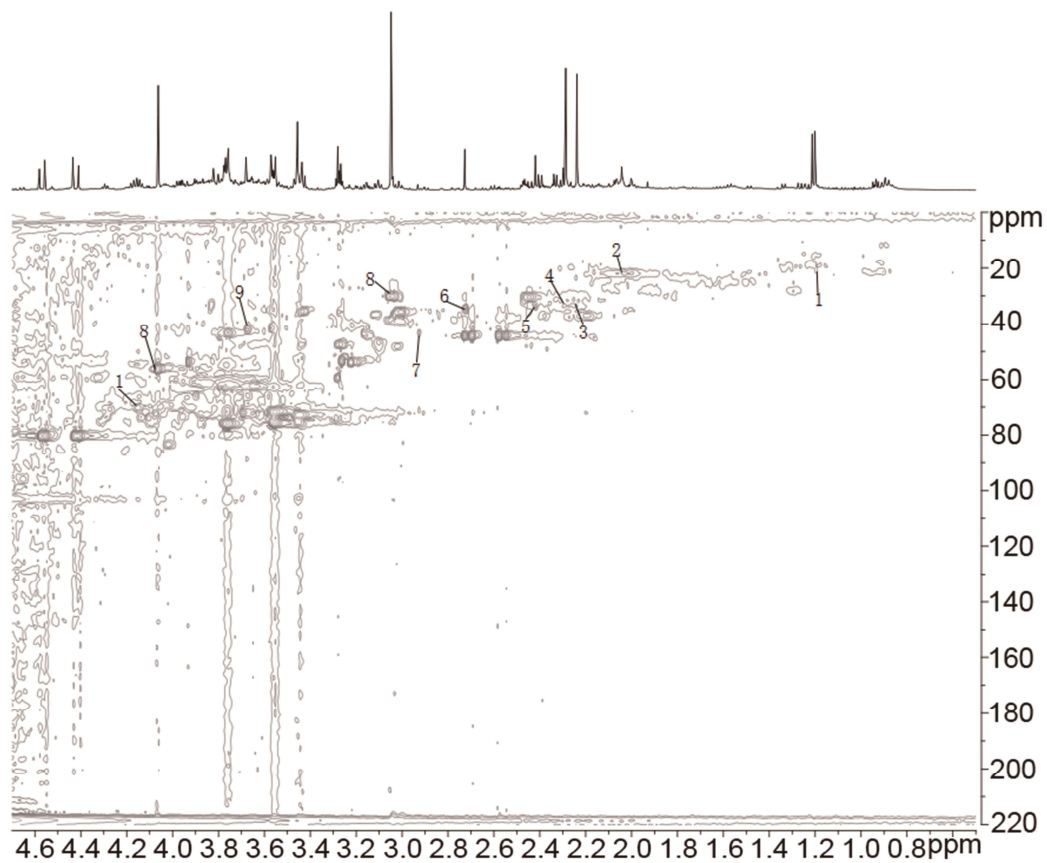

Figure S4.  $^1\text{H}$ - $^{13}\text{C}$  HSQC spectrum of model rat urine

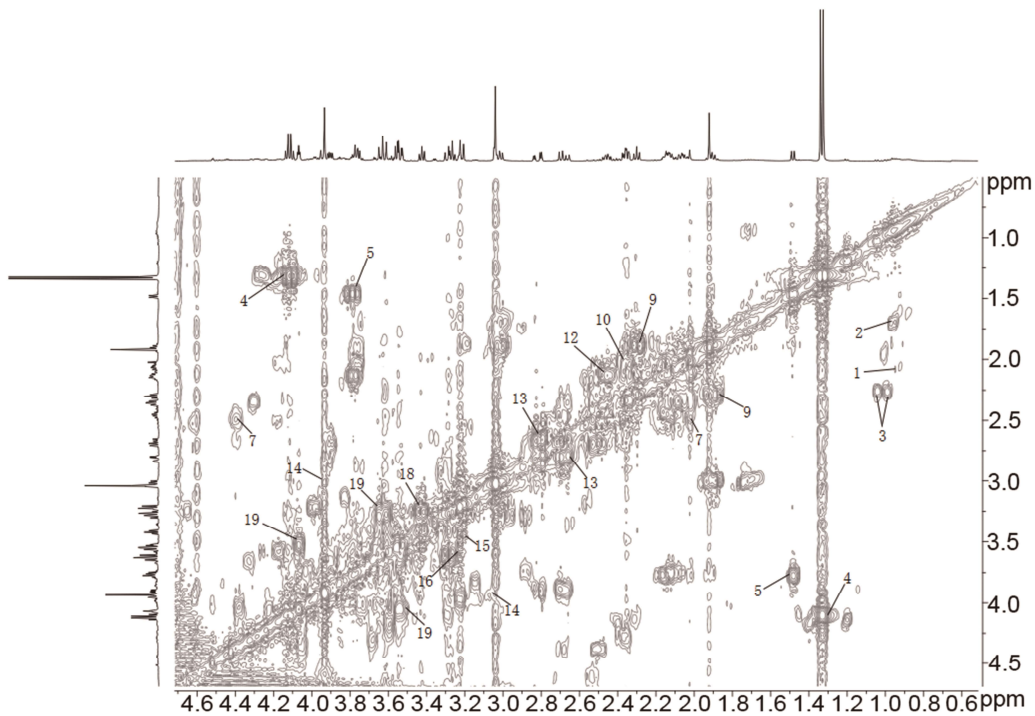

Figure S5.  $^1\text{H}$ - $^1\text{H}$  COSY spectrum of model rat brain tissue

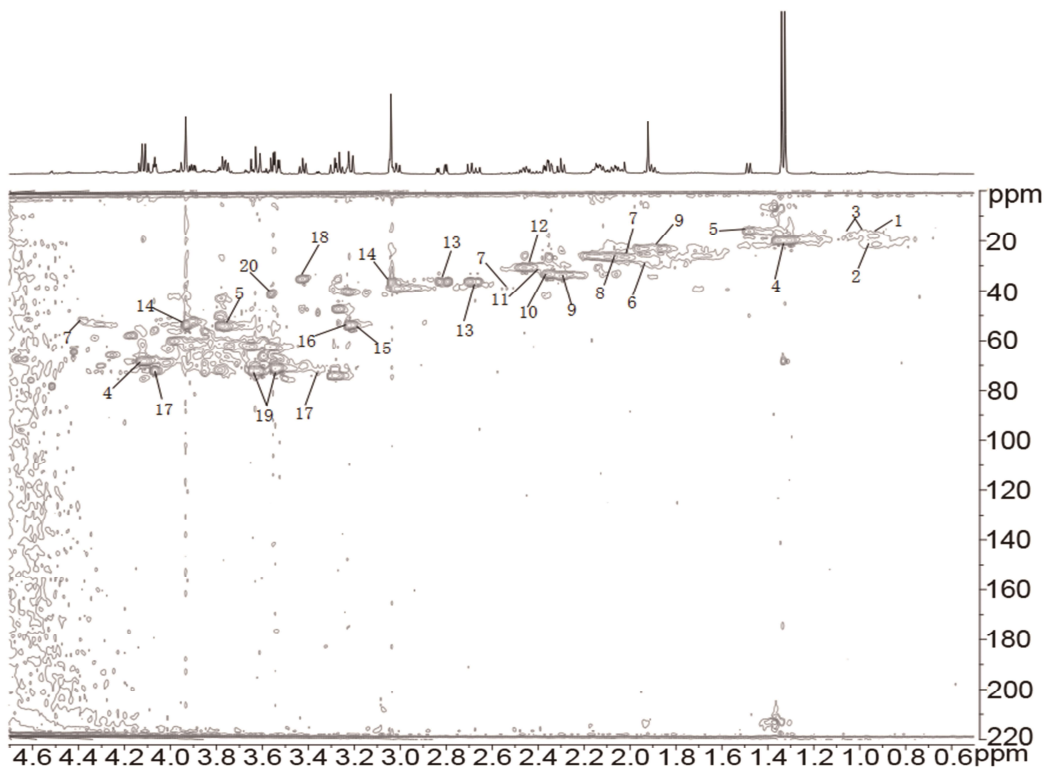

Figure S6.  $^1\text{H}$ - $^{13}\text{C}$  HSQC spectrum of model rat brain tissue



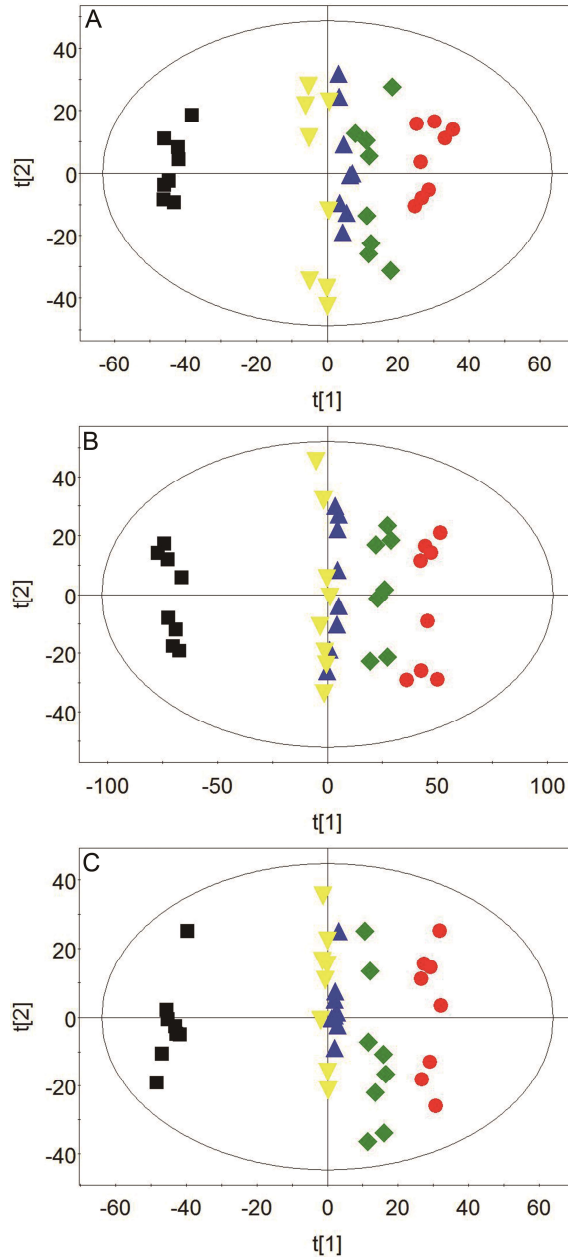

**Figure S7.** PCA scores plots for five groups from plasma (A), urine (B) and brain tissue (C).

● Control group; ■ Model group; ◆ Nimodipine group; ▲ H-TCNDS group; ▼ L-TCNDS group.

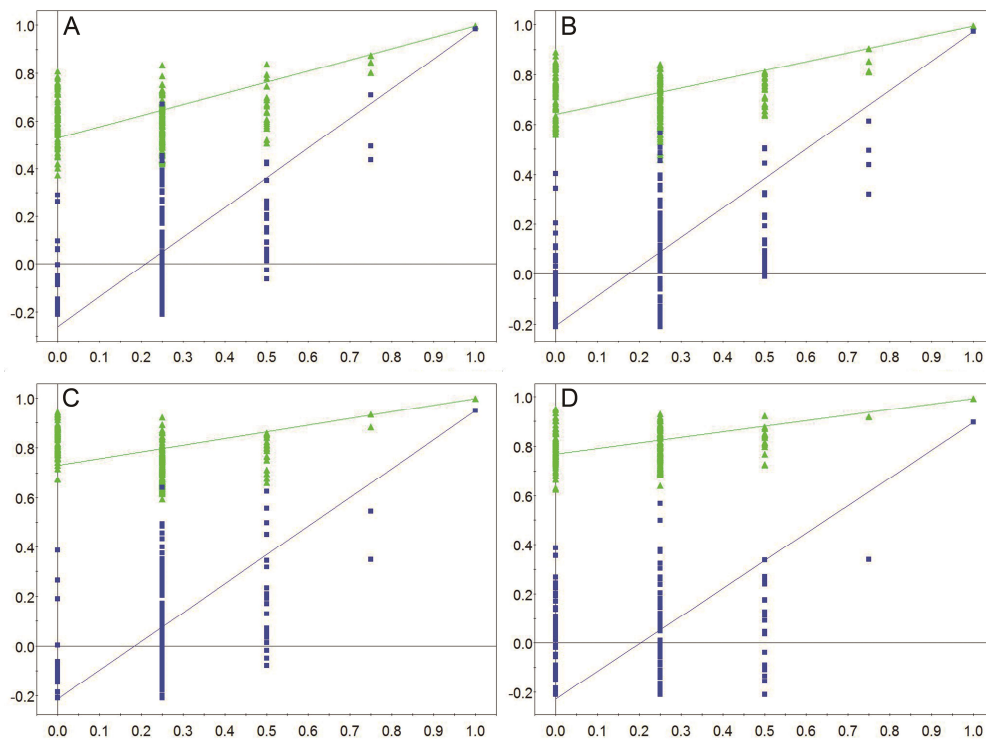

**Figure S8.** Plasma PLS-DA validation plots for model group vs control group (A), model group vs nimodipine group (B), model group vs H-TCNDS group (C), and model group vs L-TCNDS group (D).  
 ▲R<sup>2</sup>; ■Q<sup>2</sup>

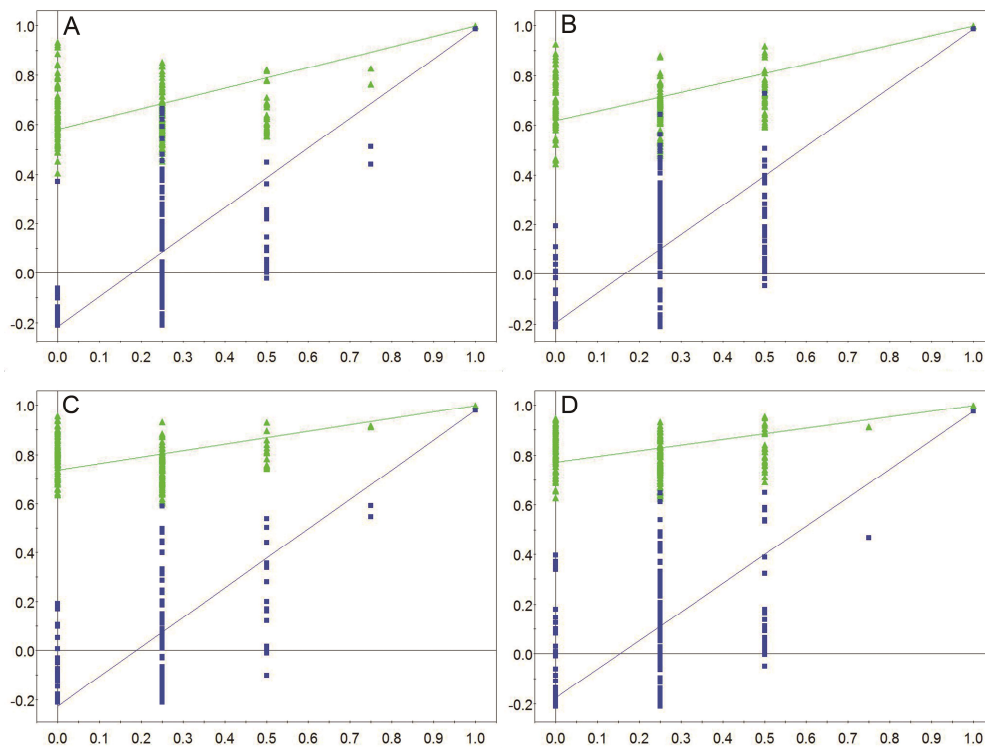

**Figure S9.** Urine PLS-DA validation plots for model group vs control group (A), model group vs nimodipine group (B), model group vs H-TCNDS group (C), and model group vs L-TCNDS group (D).

▲R2; ■Q2

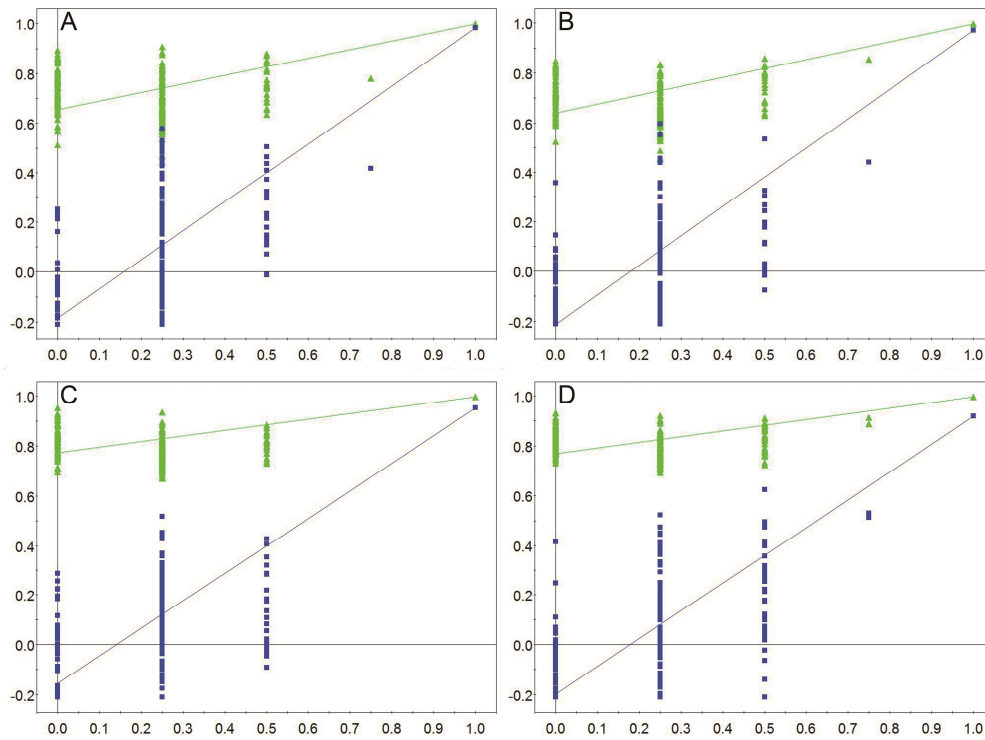

**Figure S10.** Brain PLS-DA validation plots for model group vs control group (A), model group vs nimodipine group (B), model group vs H-TCNDS group (C), and model group vs L-TCNDS group (D).  
 ▲ R<sup>2</sup>; ■ Q<sup>2</sup>
